# Supplementary material
Source: MDPI journal article supplement (https://www.mdpi.com/1999-4907/13/8/1184)
Supplement: s1 [file s1]

**Supplementary material**

The heatmap displays three rows of coefficient values for different variables over time. The columns represent time periods from 1942-1966 to 1992-2016. A color scale on the right indicates the coefficient value, ranging from -0.4 (dark red) to 0.4 (dark blue), with 0.0 being white.

- Tmax\_son:** Shows positive coefficients (red/orange) for most periods, with asterisks indicating significance for periods from 1942-1978 and 1982-1992.
- PP\_son:** Shows negative coefficients (blue/purple) for all periods, with asterisks indicating significance for almost all periods except 1982-1992.
- PP\_jja:** Shows negative coefficients (blue/purple) for all periods, with asterisks indicating significance for almost all periods except 1982-1992.

Figure S1. 25-year moving correlation functions for the significant months of Figure 2 of main manuscript text.
